# Supplementary material
Source: HighWire-hosted journal article supplement (https://jnis.bmj.com/content/neurintsurg-2017-013375)
Supplement: inline-supplementary-material-1 [file inline-supplementary-material-1.docx]

**Supplementary table**: A posteriori subgroup analysis according to the technical strategy implemented in each case

|  | **N (%)** | **mRS post treatment** | **mRS at 6 months** | **Per-procedure and technical events** | **Post - procedure complications** | **New neurologic deficit post TT** |
| --- | --- | --- | --- | --- | --- | --- |
| **Balloon remodelling followed by stent deployment** | 47 (52.2%) | 0= 39 (43.3%)  1= 2 (2.2%)  2= 3 (3.3%)  4= 1 (1.1%)  6= 2 (2.2%) | 0= 37 (46.25%)  1= 2 (2.5%)  2= 1 (1.25%)  6= 1 (1.25%) | 11 (12.2%) | 1 (1.1%) stroke, 4 (4.4%) TIA | 6 (6.6%) |
| **Coiling through deployed stent** | 14 (15.6%) | 0= 12 (13.3%)  1= 1 (1.1%)  2= 1 (1.1%) | 0= 11 (13.8%)  1= 1 (1.25%)  2= 1 (1.25%) | 1 (1.1%) | 0 | 0 |
| **Coiling first, stent deployment after** | 4 (4.4%) | 0= 4 (4.4%) | 0= 3 (3.8%) | 0 | 0 | 0 |
| **Concomitant stent and coil deployment** | 21 (23.3%) | 0= 19 (21.1%)  1= 2 (2.2%) | 0= 17 (21.3%)  1= 2 (2.5%)  3= 1 (1.25%) | 1 (1.1%) | 3 (3.3%) stroke | 1 (1.1%) |
| **Y stenting** | 4 (4.4%) | 0= 4 (4.4%) | 0= 3 (3.8%) | 0 | 0 | 0 |
| **Σ sample size** | 90 | 90 | 80 | 90 | 90 | 90 |
| **Statistic test** |  |  |  | Chi-square: 6.601 DF:4  Significance level  P = 0.1585  Chi-square (trend): 5.348 DF:1  *Significance level****: P = 0.0207*** | Chi-square: 10.055 DF: 8  Significance level:  P = 0.2612  Binominal (complication yes or no):  Chi-square:3.079 DF: 4  Significance level: P = 0.5447  Chi-square (trend): 0.000 DF: 1  Significance level:  P = 0.9952 | Chi-square: 3.752 DF: 4  Significance level:  P = 0.4406  Chi-square (trend): 1.937 DF: 1  Significance level:  P = 0.1640 |
